# Supplementary material for: Viscosity Investigations on the Binary Systems of (1 ChCl:2 Ethylene Glycol) DES and Methanol or Ethanol
Source: MDPI journal article supplement (doi:10.3390/molecules26185513), 2021-09-10
Supplement: s1 [file s1]

Supplementary Information

# Viscosity Investigations on the Binary Systems of (1 ChCl:2 Ethylene Glycol) DES and Methanol or Ethanol

Reza Haghighbakhsh <sup>1,2</sup>, Ana Rita C. Duarte <sup>2</sup> and Sona Raeissi <sup>1,\*</sup>

<sup>1</sup> School of Chemical and Petroleum Engineering, Shiraz University, Mollasadra Ave., Shiraz 71348-51154, Iran; r.haghighbakhsh@fct.unl.pt

<sup>2</sup> LAQV, REQUIMTE, Departamento de Química da Faculdade de Ciências e Tecnologia, Universidade Nova de Lisboa, 2829-516 Caparica, Portugal; ard08968@fct.unl.pt

\* Correspondence: raeissi@shirazu.ac.ir

**Table S1.** Reported values of experimental densities of pseudo-binary mixtures of (1-x) Ethaline + x methanol/ethanol at various temperatures and at a pressure of 100±5 kPa [References R1, R2].

| Reference | $x$   | Temperature (K)                    |        |        |        |        |
|-----------|-------|------------------------------------|--------|--------|--------|--------|
|           |       | 283.15                             | 293.15 | 303.15 | 313.15 | 323.15 |
|           |       | $\rho$ (g.cm <sup>-3</sup> )       |        |        |        |        |
|           |       | (1- $x$ ) Ethaline + $x$ methanol  |        |        |        |        |
| [R1]      | 0.000 | 1.1252                             | 1.1192 | 1.1133 | 1.1077 | 1.1021 |
| [R1]      | 0.105 | 1.1118                             | 1.1059 | 1.1001 | 1.0944 | 1.0888 |
| [R1]      | 0.205 | 1.0950                             | 1.0888 | 1.0828 | 1.0769 | 1.0711 |
| [R1]      | 0.300 | 1.0780                             | 1.0717 | 1.0656 | 1.0595 | 1.0534 |
| [R1]      | 0.401 | 1.0564                             | 1.0500 | 1.0437 | 1.0376 | 1.0313 |
| [R1]      | 0.501 | 1.0318                             | 1.0250 | 1.0185 | 1.0120 | 1.0056 |
| [R1]      | 0.600 | 1.0035                             | 0.9968 | 0.9898 | 0.9829 | 0.9762 |
| [R1]      | 0.704 | 0.9663                             | 0.9588 | 0.9516 | 0.9444 | 0.9373 |
| [R1]      | 0.800 | 0.9237                             | 0.9168 | 0.9092 | 0.9015 | 0.8937 |
| [R1]      | 0.904 | 0.8692                             | 0.8607 | 0.8523 | 0.8440 | 0.8355 |
| [R1]      | 1.000 | 0.8007                             | 0.7911 | 0.7817 | 0.7721 | 0.7626 |
|           |       | 293.15                             | 303.15 | 313.15 | 323.15 | 333.15 |
|           |       | (1- $x$ ) Ethaline + $x$ . ethanol |        |        |        |        |
| [R2]      | 0.000 | 1.1192                             | 1.1133 | 1.1077 | 1.1021 | 1.0965 |
| [R2]      | 0.101 | 1.0984                             | 1.0926 | 1.0868 | 1.0811 | 1.0753 |
| [R2]      | 0.182 | 1.0806                             | 1.0741 | 1.0682 | 1.0623 | 1.0566 |
| [R2]      | 0.308 | 1.0487                             | 1.0424 | 1.0363 | 1.0302 | 1.0242 |
| [R2]      | 0.401 | 1.0231                             | 1.0165 | 1.0102 | 1.0039 | 0.9979 |
| [R2]      | 0.501 | 0.9932                             | 0.9865 | 0.9799 | 0.9734 | 0.9668 |
| [R2]      | 0.598 | 0.9622                             | 0.9552 | 0.9483 | 0.9415 | 0.9347 |
| [R2]      | 0.700 | 0.9250                             | 0.9176 | 0.9104 | 0.9032 | 0.8961 |
| [R2]      | 0.798 | 0.8848                             | 0.8772 | 0.8696 | 0.8621 | 0.8543 |
| [R2]      | 0.894 | 0.8433                             | 0.8352 | 0.8271 | 0.8190 | 0.8106 |
| [R2]      | 1.000 | 0.7915                             | 0.7828 | 0.7741 | 0.7652 | 0.7559 |

**Table S2.** Calculated values of viscosity deviations from ideality for Ethaline + methanol/ethanol systems at various temperatures at a pressure of 100 kPa.

| <b>T (K)</b>            | <b>Viscosity deviation (mPa.s)</b>                                                        |              |              |              |              |         |         |         |         |        |       |
|-------------------------|-------------------------------------------------------------------------------------------|--------------|--------------|--------------|--------------|---------|---------|---------|---------|--------|-------|
|                         | <b><math>x_1</math> Ethaline (1 ChCl : 2 ethylene glycol) + <math>x_2</math> methanol</b> |              |              |              |              |         |         |         |         |        |       |
| <b><math>x_2</math></b> | <b>0.000</b>                                                                              | <b>0.105</b> | <b>0.205</b> | <b>0.300</b> | <b>0.401</b> | 0.501   | 0.600   | 0.704   | 0.800   | 0.904  | 1.000 |
| 283.15                  | 0.000                                                                                     | -17.986      | -33.943      | -39.233      | -37.012      | -34.072 | -28.843 | -22.519 | -15.677 | -7.684 | 0.000 |
| 293.15                  | 0.000                                                                                     | -12.766      | -21.904      | -25.002      | -23.551      | -21.746 | -18.433 | -14.444 | -10.086 | -4.955 | 0.000 |
| 303.15                  | 0.000                                                                                     | -7.667       | -13.403      | -15.468      | -14.612      | -13.599 | -11.580 | -9.141  | -6.416  | -3.166 | 0.000 |
| 313.15                  | 0.000                                                                                     | -5.154       | -8.902       | -10.292      | -9.736       | -9.096  | -7.773  | -6.171  | -4.352  | -2.155 | 0.000 |
| 323.15                  | 0.000                                                                                     | -3.545       | -6.123       | -7.088       | -6.713       | -6.302  | -5.407  | -4.320  | -3.065  | -1.531 | 0.000 |
|                         | <b><math>x_1</math> Ethaline (1 ChCl : 2 ethylene glycol) + <math>x_2</math> ethanol</b>  |              |              |              |              |         |         |         |         |        |       |
| <b><math>x_2</math></b> | <b>0.000</b>                                                                              | <b>0.108</b> | <b>0.203</b> | <b>0.301</b> | <b>0.401</b> | 0.500   | 0.600   | 0.699   | 0.805   | 0.904  | 1.000 |
| 293.15                  | 0.000                                                                                     | -11.048      | -16.200      | -21.226      | -21.081      | -19.617 | -16.729 | -13.449 | -9.031  | -4.520 | 0.000 |
| 303.15                  | 0.000                                                                                     | -6.513       | -9.671       | -12.906      | -12.929      | -12.128 | -10.387 | -8.407  | -5.659  | -2.832 | 0.000 |
| 313.15                  | 0.000                                                                                     | -4.375       | -6.411       | -8.546       | -8.579       | -8.080  | -6.929  | -5.634  | -3.802  | -1.903 | 0.000 |
| 323.15                  | 0.000                                                                                     | -3.006       | -4.381       | -5.856       | -5.896       | -5.573  | -4.787  | -3.908  | -2.643  | -1.320 | 0.000 |
| 333.15                  | 0.000                                                                                     | -2.402       | -3.339       | -4.368       | -4.372       | -4.125  | -3.536  | -2.888  | -1.950  | -0.967 | 0.000 |

## References:

- [R1] Haghbakhsh, R.; Raeissi, S. Experimental investigation on the volumetric properties of mixtures of the deep eutectic solvent of Ethaline and methanol in the temperature range of 283.15 to 323.15 K. *J. Chem. Thermodyn.* **2020**, *147*, 106124.
- [R2] Haghbakhsh, R.; Raeissi, S. A study of nonideal mixtures of ethanol and the 1 choline chloride + 2 ethylene glycol deep eutectic solvent for their volumetric behavior. *J. Chem. Thermodyn.* **2020**, *150*, 106219.
